# Supplementary material for: Crystal aggregation into periodically grating-banded assemblies in phthalic acid modulated by molten poly(ethylene oxide)
Source: Royal Society of Chemistry journal article supplement (doi:10.1039/c9ce01366k), 2019-11-15
Supplement: c9ce01366k1.pdf [file c9ce01366k1.pdf]

## Supporting Information

### Crystal Aggregation into Periodically Grating-Banded Assembly in Phthalic Acid Modulated by Molten Poly(ethylene oxide)

Tzu-Yu Chen, Eamor M. Woo\*, and Selvaraj Nagarajan

Department of Chemical Engineering, National Cheng Kung University, Tainan, 701, Taiwan

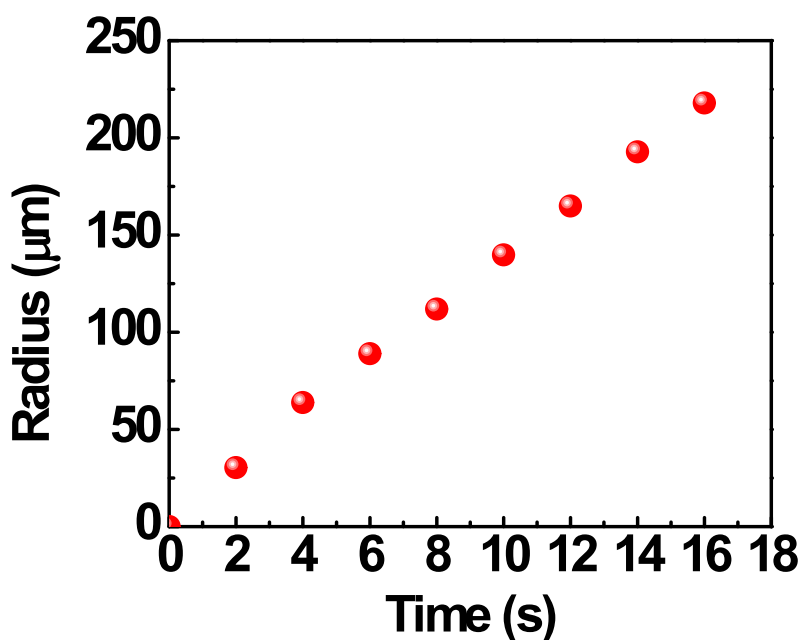

**Figure S1.** PA/PEO (50:50) blend crystallized at 70°C spherulite radius with time, the growth rate is 13.4  $\mu\text{/s}$ .

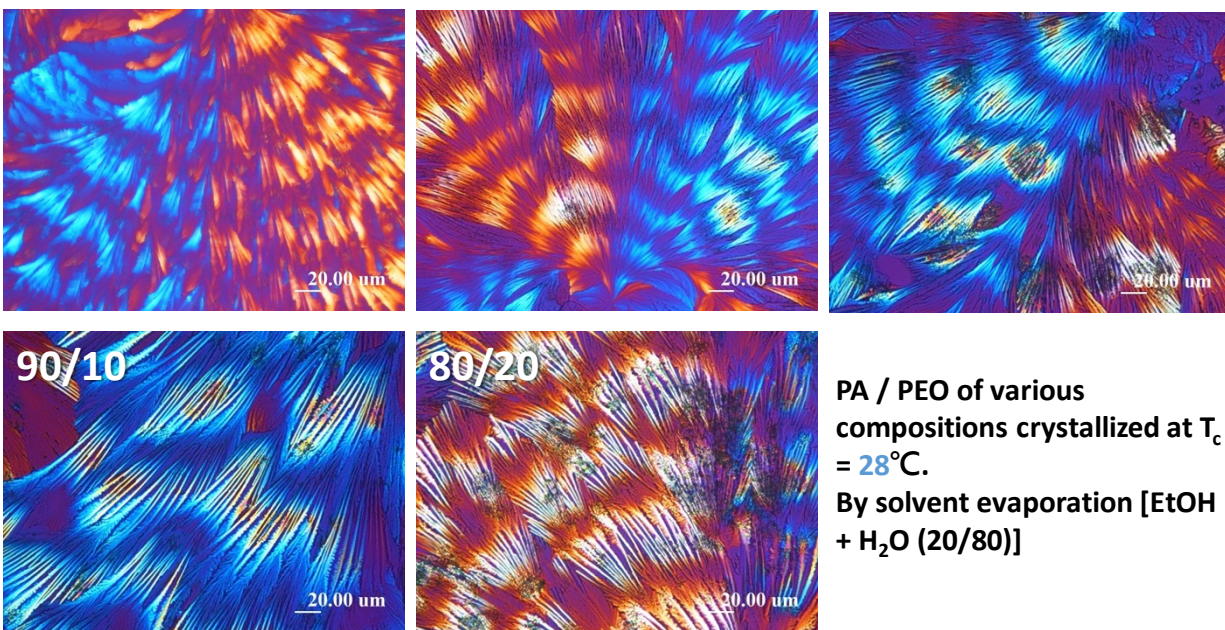

Figure S2. POM micrographs for PA / PEO of various compositions crystallized at  $T_c = 28^\circ\text{C}$ .  
By solvent evaporation [EtOH + H<sub>2</sub>O (20/80)]

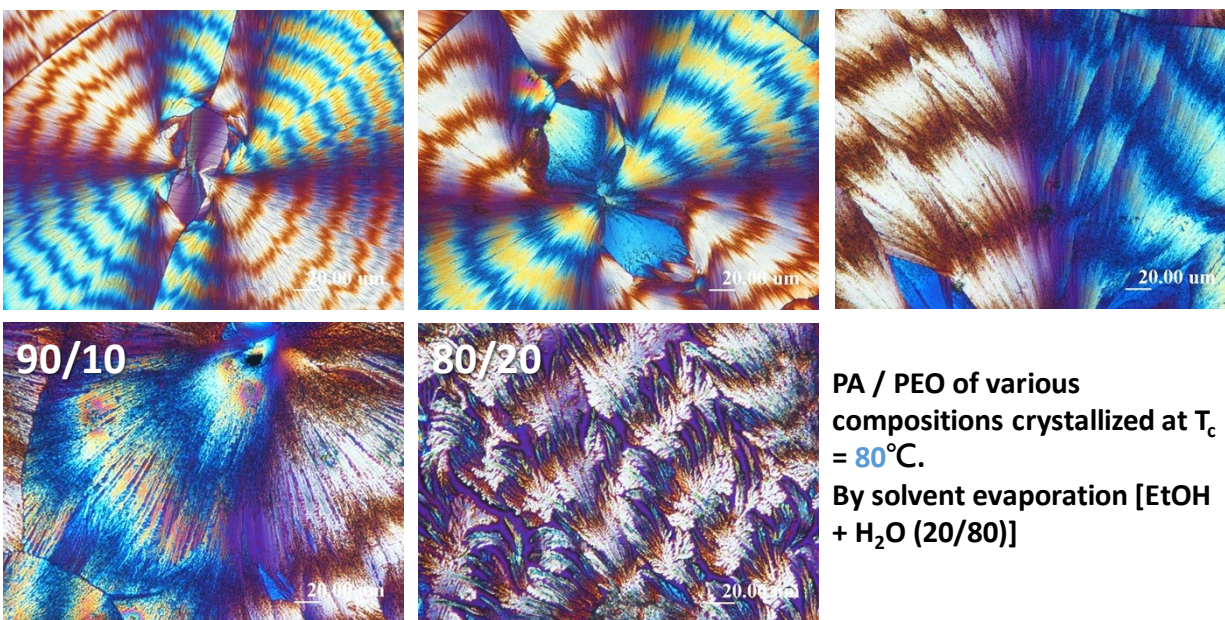

Figure S3. POM micrographs for PA / PEO of various compositions crystallized at  $T_c = 80^\circ\text{C}$ .  
By solvent evaporation [EtOH + H<sub>2</sub>O (20/80)].



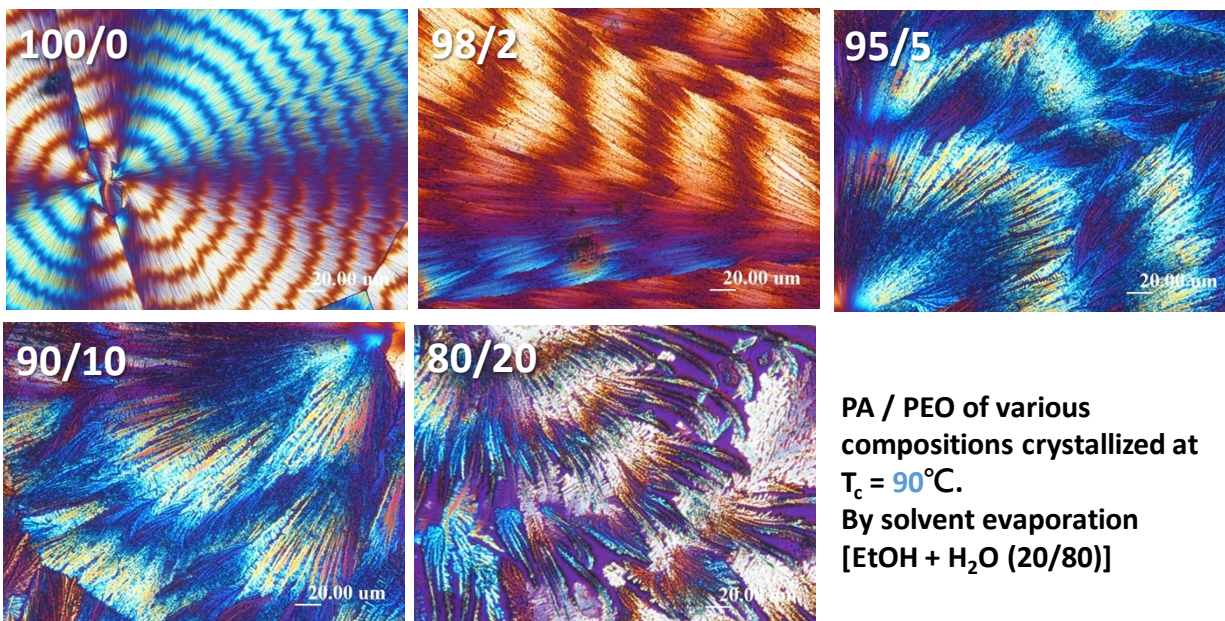

Figure S4. POM micrographs for PA / PEO of various compositions crystallized at  $T_c = 90^\circ\text{C}$ .  
By solvent evaporation [EtOH + H<sub>2</sub>O (20/80)].

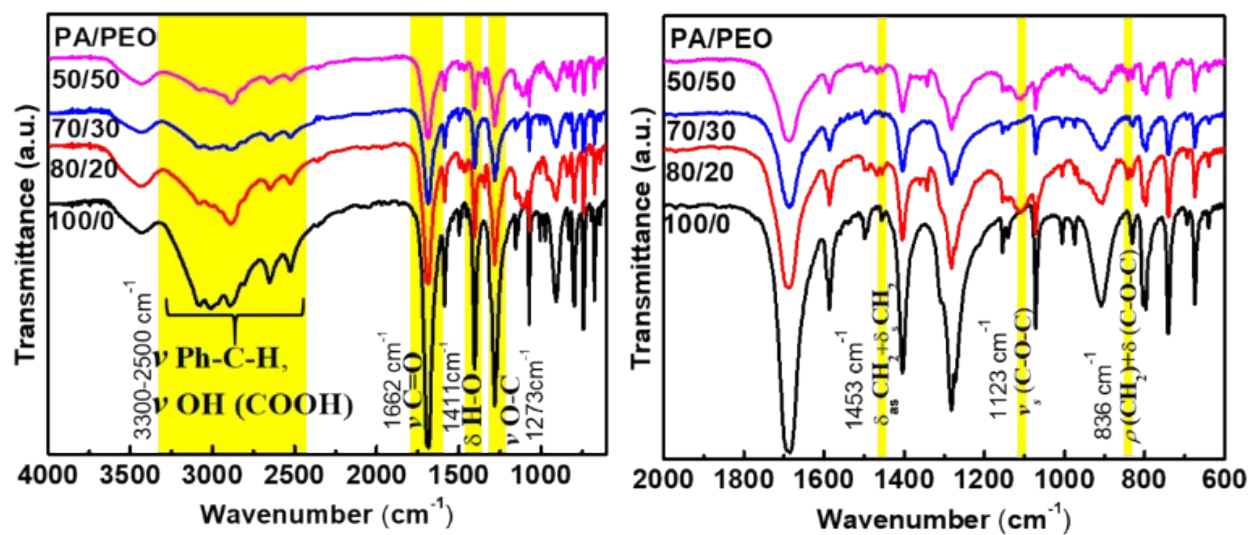

**Figure S5.** FTIR spectra for neat PA in comparison with PA/PEO blend of (80/20) and (50/50) compositions.

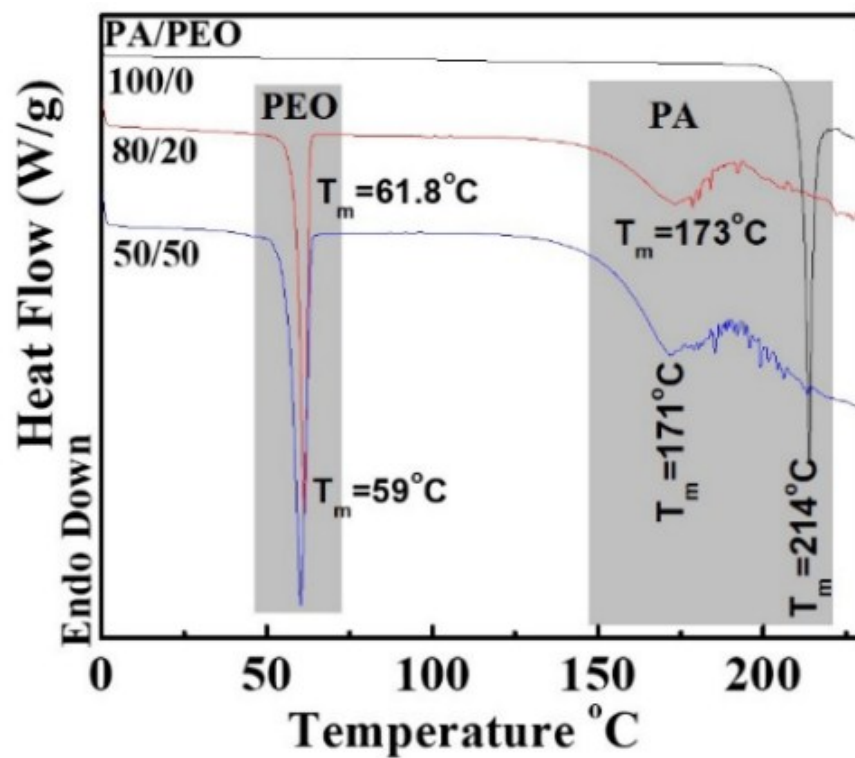

**Figure S6.** DSC traces (10°C /min) for neat PA in comparison with PA/PEO blend of (80/20) and (50/50) compositions.
